# Supplementary material for: Empirical assessment of the impact of sample number and read depth on RNA-Seq analysis workflow performance
Source: PubMed Central journal article supplement (PMC6234607; doi:10.1186/s12859-018-2445-2), 2018-11-14

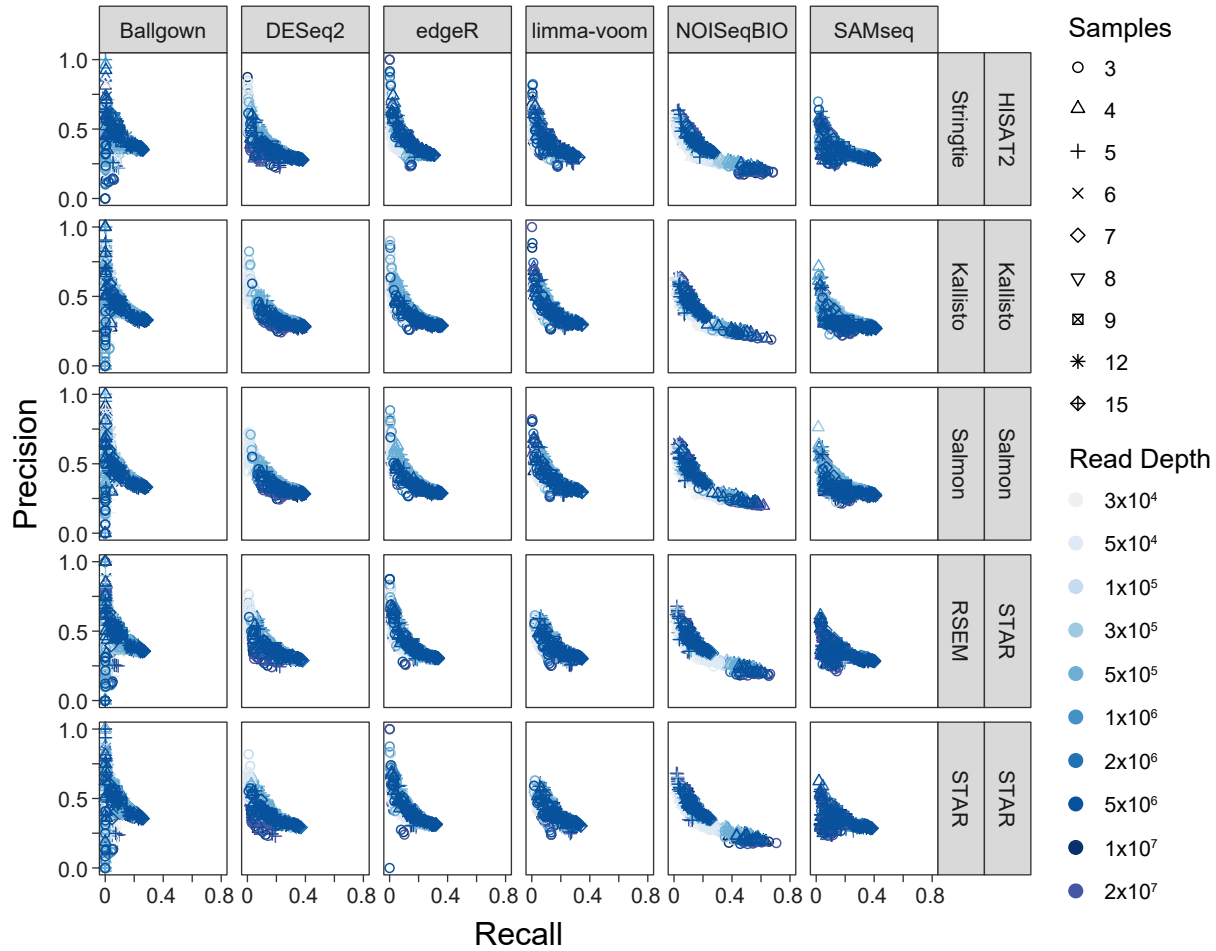

Supplement: 12859_2018_2445_MOESM5_ESM.pdf [file 12859_2018_2445_MOESM5_ESM.pdf]
